# Supplementary material for: Gallium (III) Complexes Based on Aminobisphenolate Ligands: Extremely High Active ROP-Initiators from Well-Known and Easily Accessible Compounds
Source: MDPI journal article supplement (doi:10.3390/ijms232415649), 2022-12-09
Supplement: s1 [file s1]

## Supporting Information

### Gallium (III) complexes based on aminobisphenolate ligands: extremely high active ROP-initiators from well-known and easily accessible compounds

Badma N. Mankaev,<sup>1,2</sup> Leyla. F. Hasanova,<sup>1</sup> Andrei V. Churakov,<sup>3</sup> Mikhail P. Egorov,<sup>2</sup> and Sergey S. Karlov<sup>1,2,\*</sup>

<sup>1</sup>*Chemistry Department, Moscow State University, 119991 Moscow, Russia;*

<sup>2</sup>*N.D. Zelinsky Institute of Organic Chemistry, Russian Academy of Science, 119991 Moscow, Russia;*

<sup>3</sup>*Institute of General and Inorganic Chemistry, Russian Academy of Science, Moscow, 119991, Russia.*

*\*Correspondence: s.s.karlov@chemistry.msu.ru*

### Table of Contents

|                                                                                                          |    |
|----------------------------------------------------------------------------------------------------------|----|
| <b>Figure S1</b> <sup>1</sup> H NMR spectrum of PCL-200 (Table 1, entry 6) in CDCl <sub>3</sub> .....    | S2 |
| <b>Figure S2</b> <sup>1</sup> H NMR spectrum of <b>3</b> in C <sub>6</sub> D <sub>6</sub> .....          | S3 |
| <b>Figure S3</b> <sup>13</sup> C NMR spectrum of <b>3</b> in C <sub>6</sub> D <sub>6</sub> .....         | S3 |
| <b>Figure S4</b> <sup>1</sup> H NMR spectrum of complex <b>4</b> in C <sub>6</sub> D <sub>6</sub> .....  | S4 |
| <b>Figure S5</b> <sup>13</sup> C NMR spectrum of complex <b>4</b> in C <sub>6</sub> D <sub>6</sub> ..... | S4 |
| <b>Figure S6</b> <sup>1</sup> H NMR spectrum of complex <b>5</b> in C <sub>6</sub> D <sub>6</sub> .....  | S5 |
| <b>Figure S7</b> <sup>13</sup> C NMR spectrum of complex <b>5</b> in C <sub>6</sub> D <sub>6</sub> ..... | S5 |
| <b>Figure S8</b> <sup>1</sup> H NMR spectrum of complex <b>6</b> in C <sub>6</sub> D <sub>6</sub> .....  | S6 |
| <b>Figure S9</b> <sup>13</sup> C NMR spectrum of complex <b>6</b> in C <sub>6</sub> D <sub>6</sub> ..... | S6 |

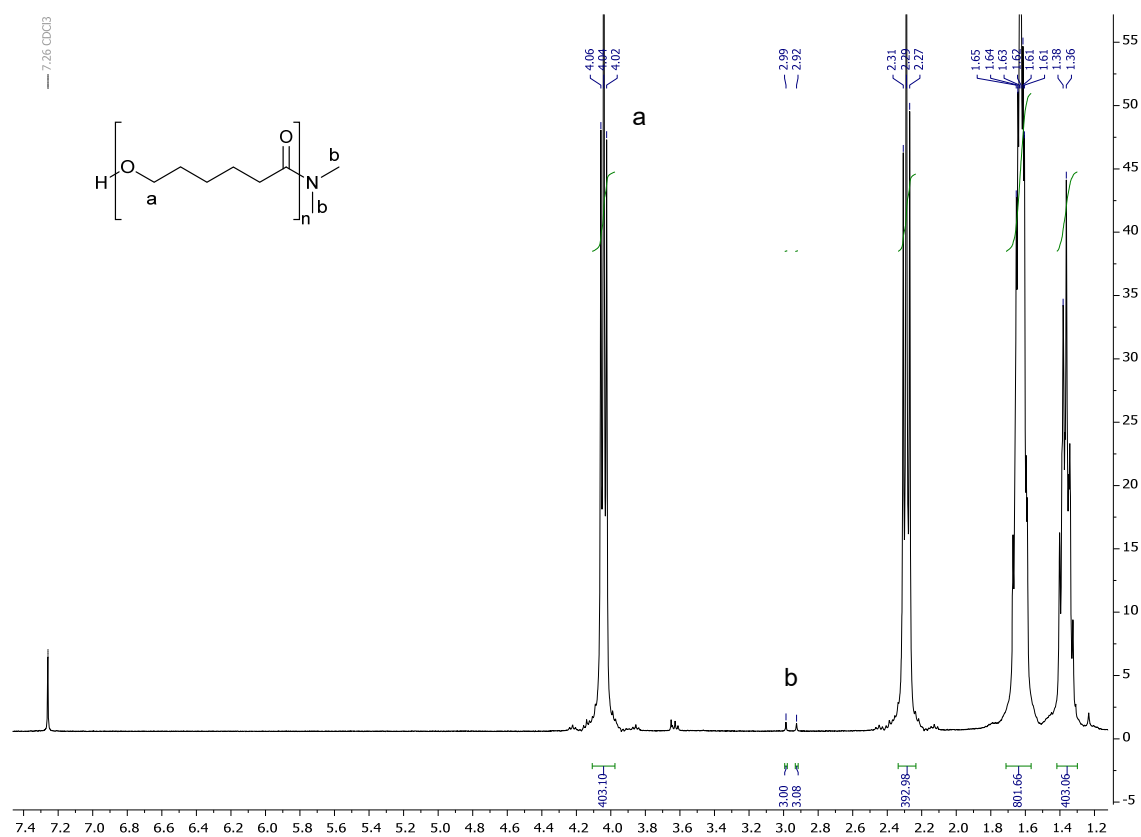

**Figure S1** <sup>1</sup>H NMR spectrum of PCL-200 (Table 1, entry 6) in CDCl<sub>3</sub>.

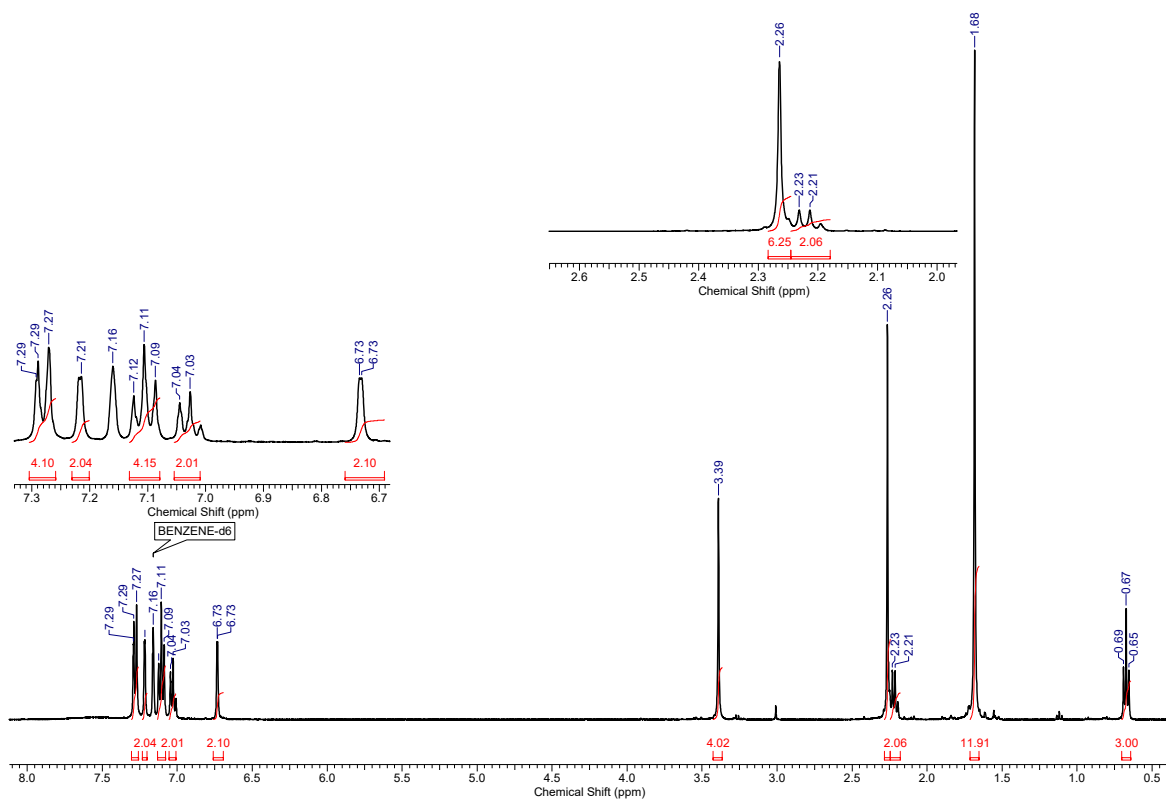

**Figure S2** <sup>1</sup>H NMR spectrum of **3** in C<sub>6</sub>D<sub>6</sub>.

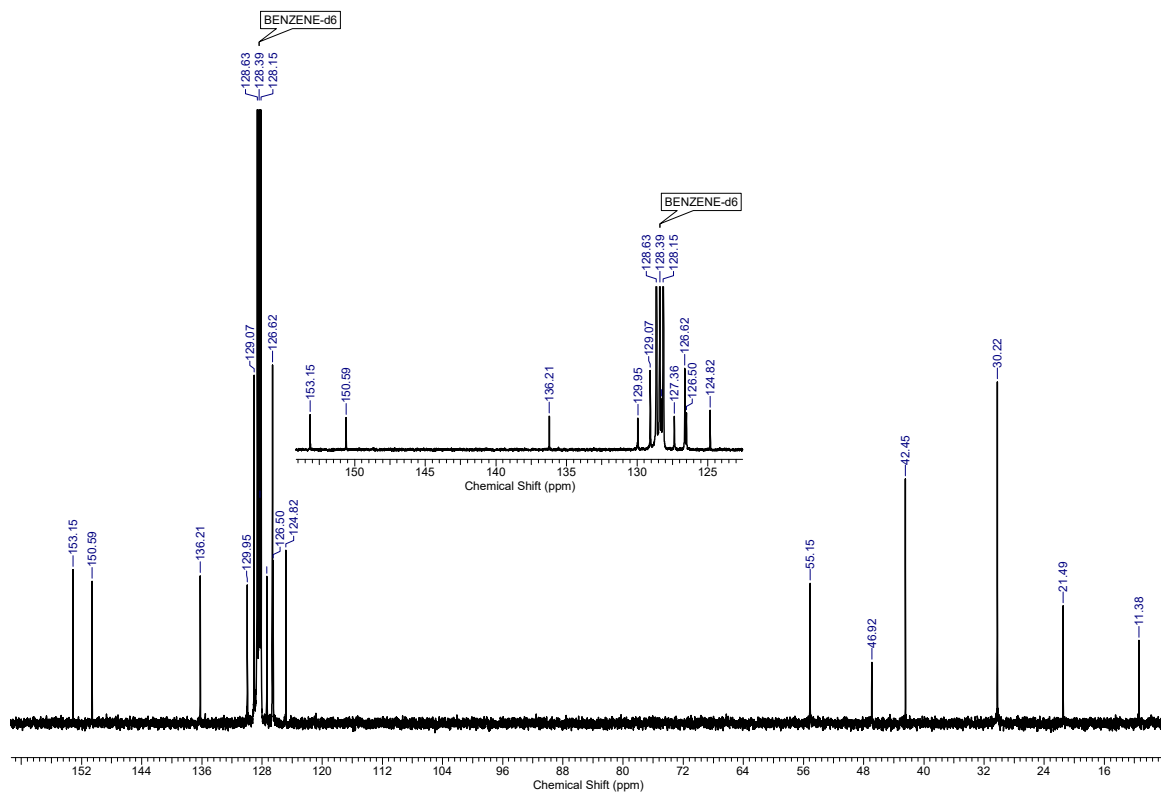

**Figure S3** <sup>13</sup>C NMR spectrum of **3** in C<sub>6</sub>D<sub>6</sub>.

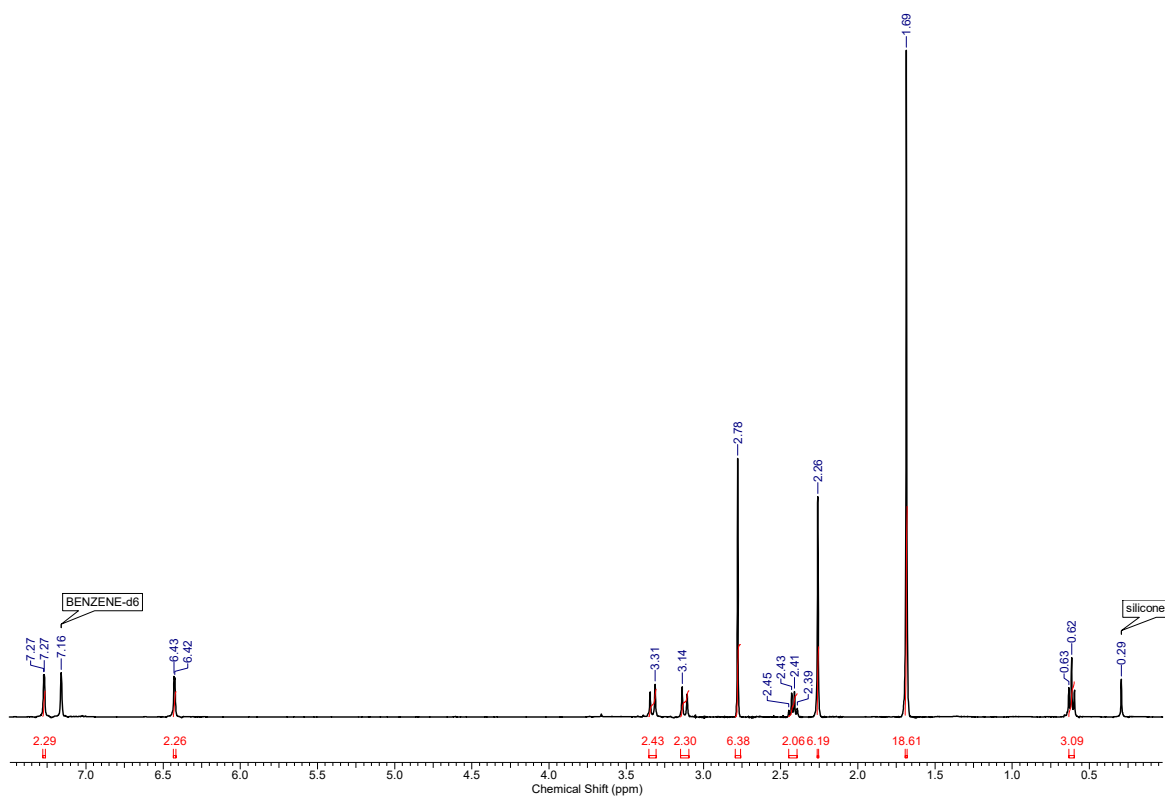

Figure S4 <sup>1</sup>H NMR spectrum of complex 4 in C<sub>6</sub>D<sub>6</sub>.

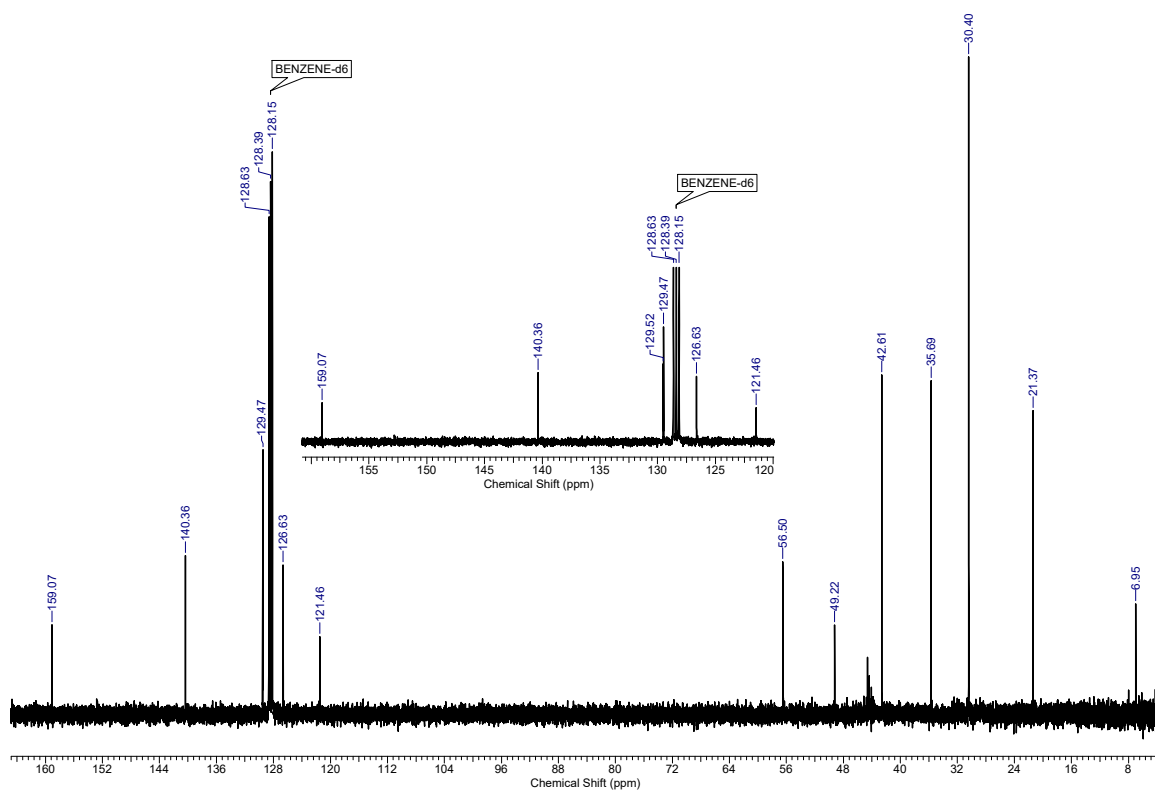

Figure S5 <sup>13</sup>C NMR spectrum of complex 4 in C<sub>6</sub>D<sub>6</sub>.

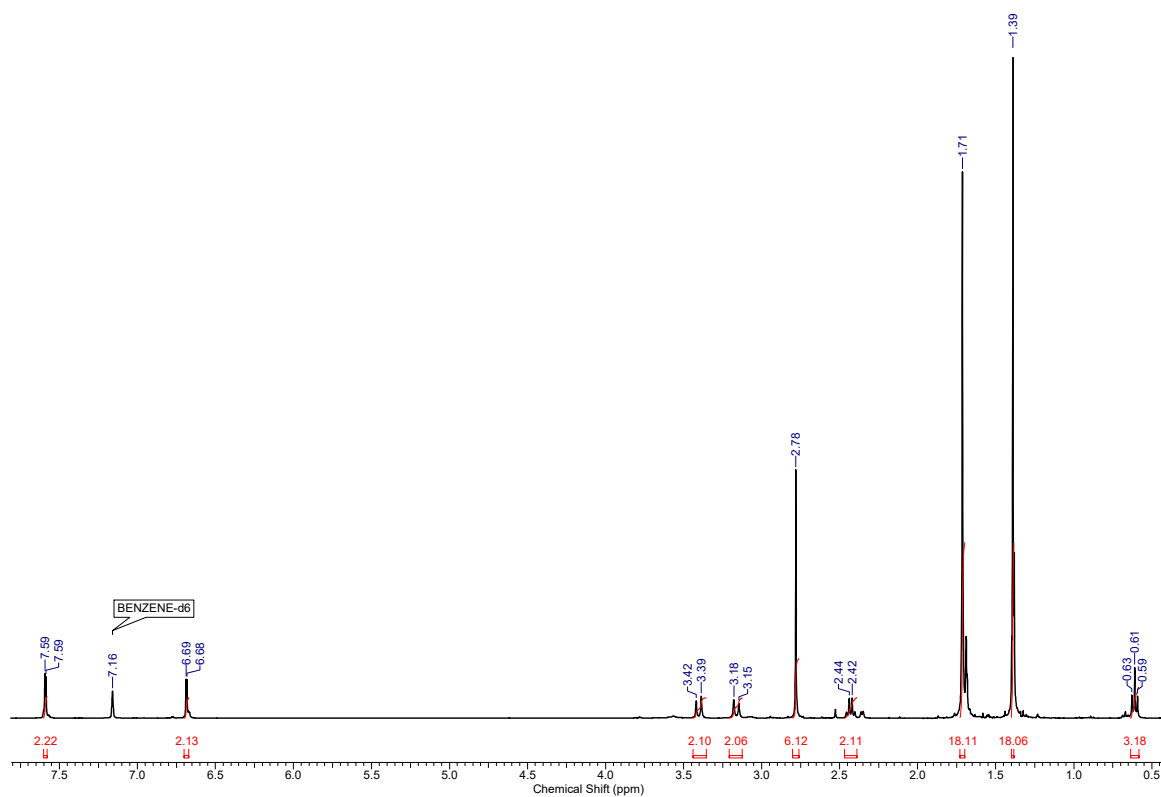

**Figure S6** <sup>1</sup>H NMR spectrum of complex **5** in C<sub>6</sub>D<sub>6</sub>.

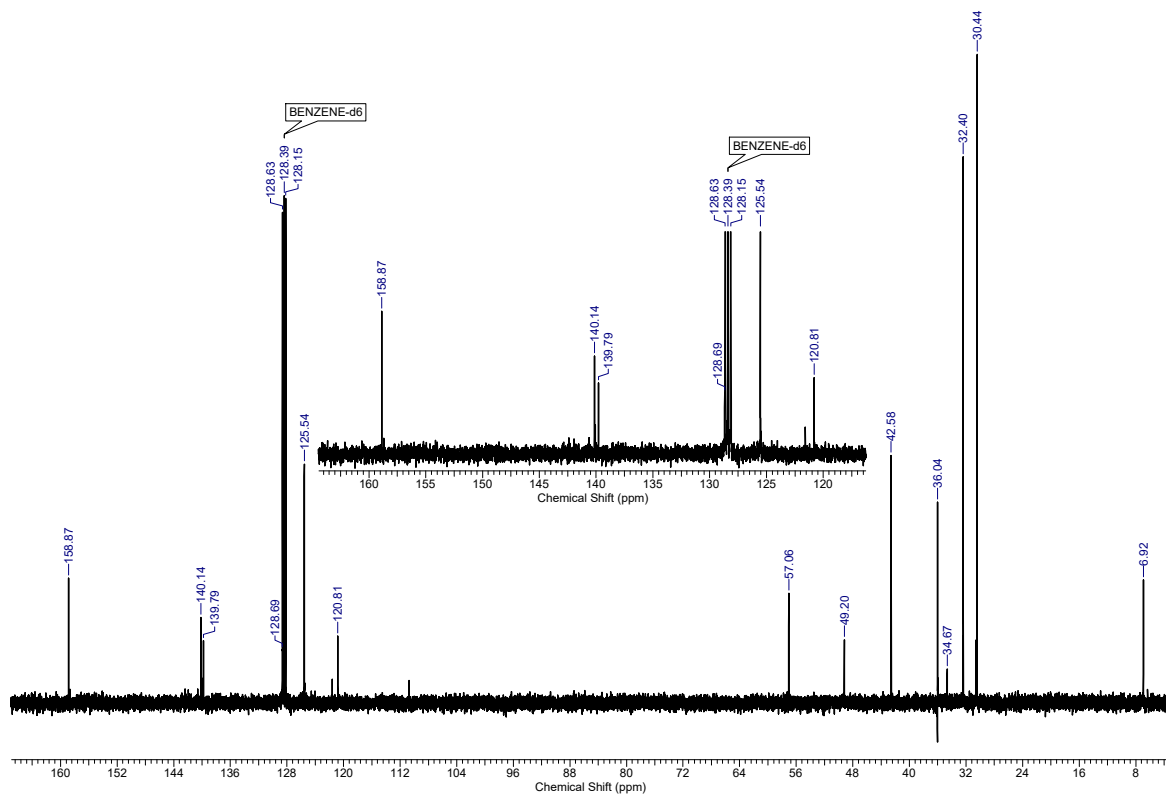

**Figure S7** <sup>13</sup>C NMR spectrum of complex **5** in C<sub>6</sub>D<sub>6</sub>.

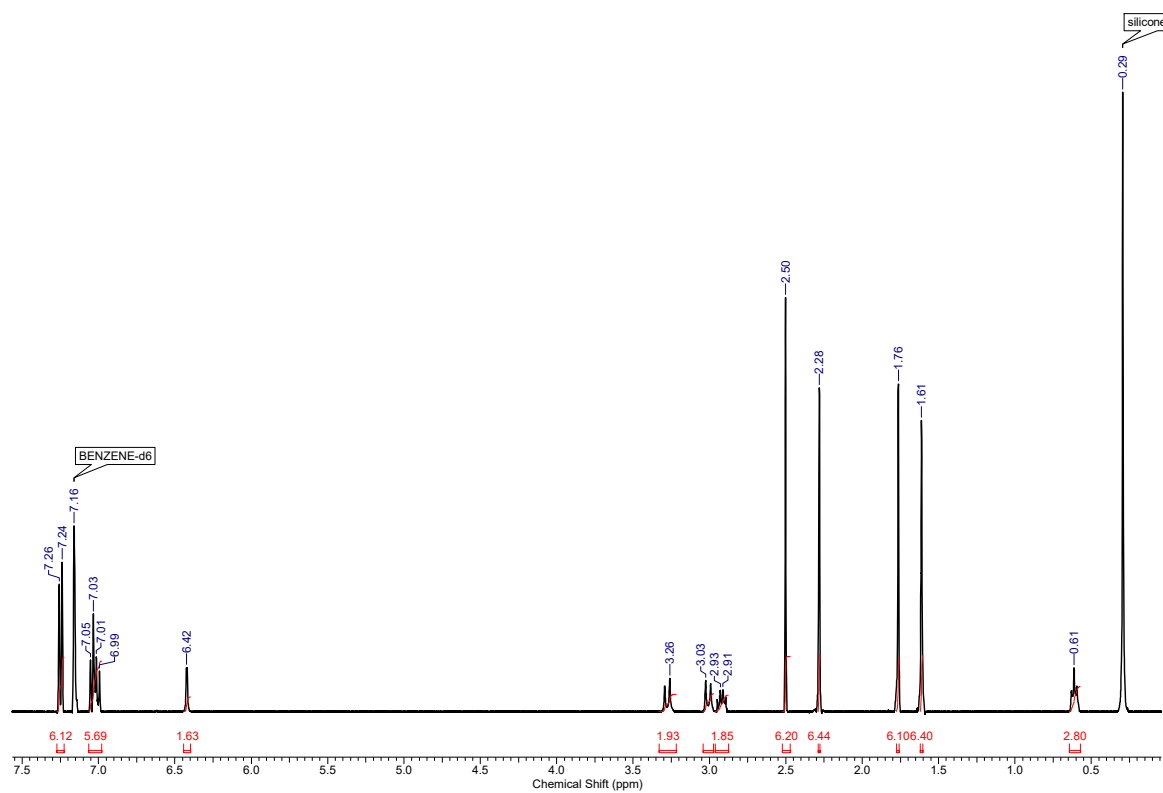

Figure S8 <sup>1</sup>H NMR spectrum of complex 6 in C<sub>6</sub>D<sub>6</sub>.

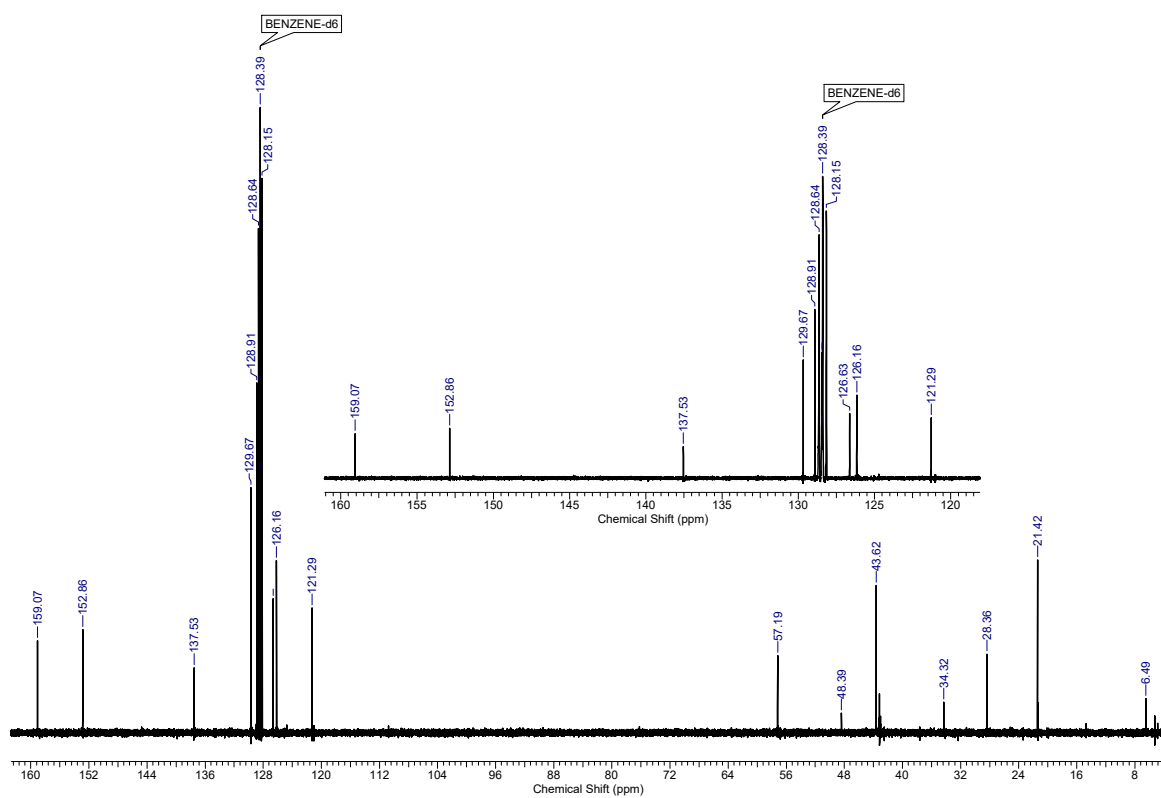

Figure S9 <sup>13</sup>C NMR spectrum of complex 6 in C<sub>6</sub>D<sub>6</sub>.
